# Supplementary material for: Characterization of Osteoarthritis in a Medial Meniscectomy-Induced Animal Model Using Contrast-Enhanced X-Ray Microtomography
Source: Preprints.org preprint supplement (doi:10.20944/preprints202002.0106.v1), 2020-02-09
Supplement: Supplementary file 2 [file supplementary]

## Sheet: Sheet1
Supplemental table 1 The primer seqences for rat
		No.	Gene	Full name	Primer sequences		Amplicons (bp)		No.	Gene symbols	Full name	Primer sequences		Amplicons (bp)
		1	Tjp1	Tight Junction Protein 1	F：	TCTCAACAGAAAGCAGAAGCCT	161		18	αSma	Actin Alpha 2, Smooth Muscle	F：	GGAGATGGCGTGACTCACAA	152
					R：	TCAGCTTGTGATACGTGCGA						R：	CGCTCAGCAGTAGTCACGAA
		2	Cdh2	Cadherin 2	F：	CACCCGGCTTAAGGGTGATT	144		19	Col1a1	Collagen Type I Alpha 1 Chain	F：	GTACATCAGCCCAAACCCCA	87
					R：	TGGCAAACTTTCACACGCAG						R：	TCGCTTCCATACTCGAACTGG
		3	Vim	Vimentin	F：	TGCGGCTGCGAGAAAAATTG	111		20	Tgfβ-1	Transforming Growth Factor Beta 1	F：	CTTTGTACAACAGCACCCGC	127
					R：	GGTCAAGACGTGCCAGAGAA						R：	TAGATTGCGTTGTTGCGGTC
		4	Zeb1	Zinc Finger E-Box Binding Homeobox 1	F：	TGGGATGTACGCATGTGACC	91		21	Bmp2	Bone Morphogenetic Protein 2	F：	CACGAAGAAGCCATCGAGGA	140
					R：	GGGCCTCTTACCTGTATGCTC						R：	GCTTCCTGCATTTGTTCCCG
		5	Zeb2	Zinc Finger E-Box Binding Homeobox 2	F：	CCACGCAGTCAGCATTGAAG	135		22	Bmp4	Bone MorphogeneticnProtein 4	F：	TGGGGAGGAGGAGGAAGAAG	111
					R：	GTTCCAGGTGGCAGGTCATT						R：	TCCAGATGTTCTTCGTGATGGA
		6	Snail1	Snail Family Transcriptional Repressor 1	F：	CACCCACACTGGTGAGAAGC	146		23	Il1-β	Interleukin 1 Beta	F：	CAGCTTTCGACAGTGAGGAGA	139
					R：	ACATTCGGGAGAAGGTTCGG						R：	TTGTCGAGATGCTGCTGTGA
		7	Mcp1	C-C Motif Chemokine Ligand 2; Monocyte Chemoattractant Protein-1	F：	TGTCTCAGCCAGATGCAGTTAAT	82		24	Il-6	Interleukin 6	F：	TTCTCTCCGCAAGAGACTTCC	94
					R：	TCCAGCCGACTCATTGGGAT						R：	TCTCCTCTCCGGACTTGTGAA
		8	Mcp3	C-C Motif Chemokine Ligand 7; Monocyte Chemoattractant Protein-3	F：	CCAACCAGATGGGACCAATTC	177		25	Tnf-α	Tumor Necrosis Factor-Alpha	F：	ATGGGCTCCCTCTCATCAGT	106
					R：	TCAACCCACTTCTGATGGGC						R：	GCTTGGTGGTTTGCTACGAC
		9	Mpo	Myeloperoxidase	F：	AATGTCACAGGGGACATGCG	132		26	Nfκ-b1	Nuclear Factor Kappa B Subunit 1	F：	CTGGCAGCTCTTCTCAAAGC	70
					R：	AAGCTTCTCCCCATTCCAGC						R：	CCAGGTCATAGAGAGGCTCAA
		10	Lcn2	Lipocalin 2	F：	GGGCTGTCCGATGAACTGAA	98		27	Cox2	Cyclooxygenase 2	F：	CTCAGCCATGCAGCAAATCC	172
					R：	CATTGGTCGGTGGGAACAGA						R：	GGGTGGGCTTCAGCAGTAAT
		11	Elane	Elastase, Neutrophil Expressed	F：	ACTTCTGTGGTGCCACACTC	75		28	Mmp3	Matrix Metallopeptidase 3	F：	AAAGACAGGCACTTTTGGCG	91
					R：	GGAAATTTCGGCCATTCACACA						R：	TGTTGGATGGAAGAGACGGC
		12	Vegfa	Vascular Endothelial Growth Factor A	F：	AGCCCATGAAGTGGTGAAGT	164		29	Adamts4	ADAM Metallopeptidase With Thrombospondin Type 1 Motif 4	F：	GGACTTGTGGAGGTGGTGTC	152
					R：	CTTCATCATTGCAGCAGCCC						R：	TTCACGGAAGGTCAATGCTGA
		13	Vegfb	Vascular Endothelial Growth Factor B	F：	ACCTGCAGATCATCAGAAACT	179		30	Adamts5	ADAM Metallopeptidase With Thrombospondin Type 1 Motif 5	F：	GCCCACCTAACGGCAAATCT	118
					R：	TCGTGTAAAGCCCGTGGAAA						R：	AGGACACCTGCGTATTTGGG
		14	Vegfc	Vascular Endothelial Growth Factor C	F：	TCTTGTCTCTGGCGTGTTCC	143		31	Prg4	Proteoglycan 4	F：	GCGAAGAAGTGCATAATCCCAC	79
					R：	GCCTTCGAAACCCTTGACCT						R：	GATTTGATGGTGCGAGACGC
		15	Ki67	Marker Of Proliferation Ki-67	F：	CTGCTGACCCTGATGGGAAA	168		32	Hprt1	Hypoxanthine Phosphoribosyltransferase 1	F：	GCCCTTGACTATAATGAGCACTTCA	80
					R：	TGCGATCGTGCTGTTCTACA						R：	GCTTTGTACTTGGCTTTTCCACTT
		16	Pcna	Proliferating Cell Nuclear Antigen	F：	TGCAGATGTACCCCTTGTTGT	167
					R：	AAGACCTCAGAACACGCTGG			F: forward primer (5'-3'), R: reverse primer (5'-3')
		17	Mcm2	Minichromosome Maintenance Complex Component 2	F：	GGACAAGGCCAGGCAGATCAAT	154
					R：	GACTGAGCCTCGTCCAGACA
